# Supplementary material for: Identification of a neuronal population in the telencephalon essential for fear conditioning in zebrafish
Source: PubMed Central journal article supplement (PMC5978991; doi:10.1186/s12915-018-0502-y), 2018-04-25

**Supplementary Figure 2. GFP expression patterns of 16 Gal4FF;UAS:GFP fish that showed reduced performance of the active avoidance response**

**a**

hspGGFF10C

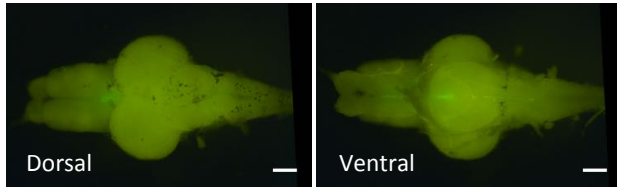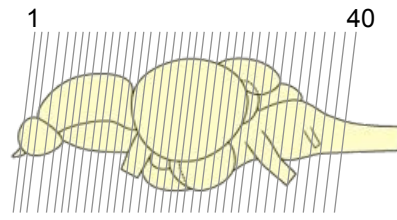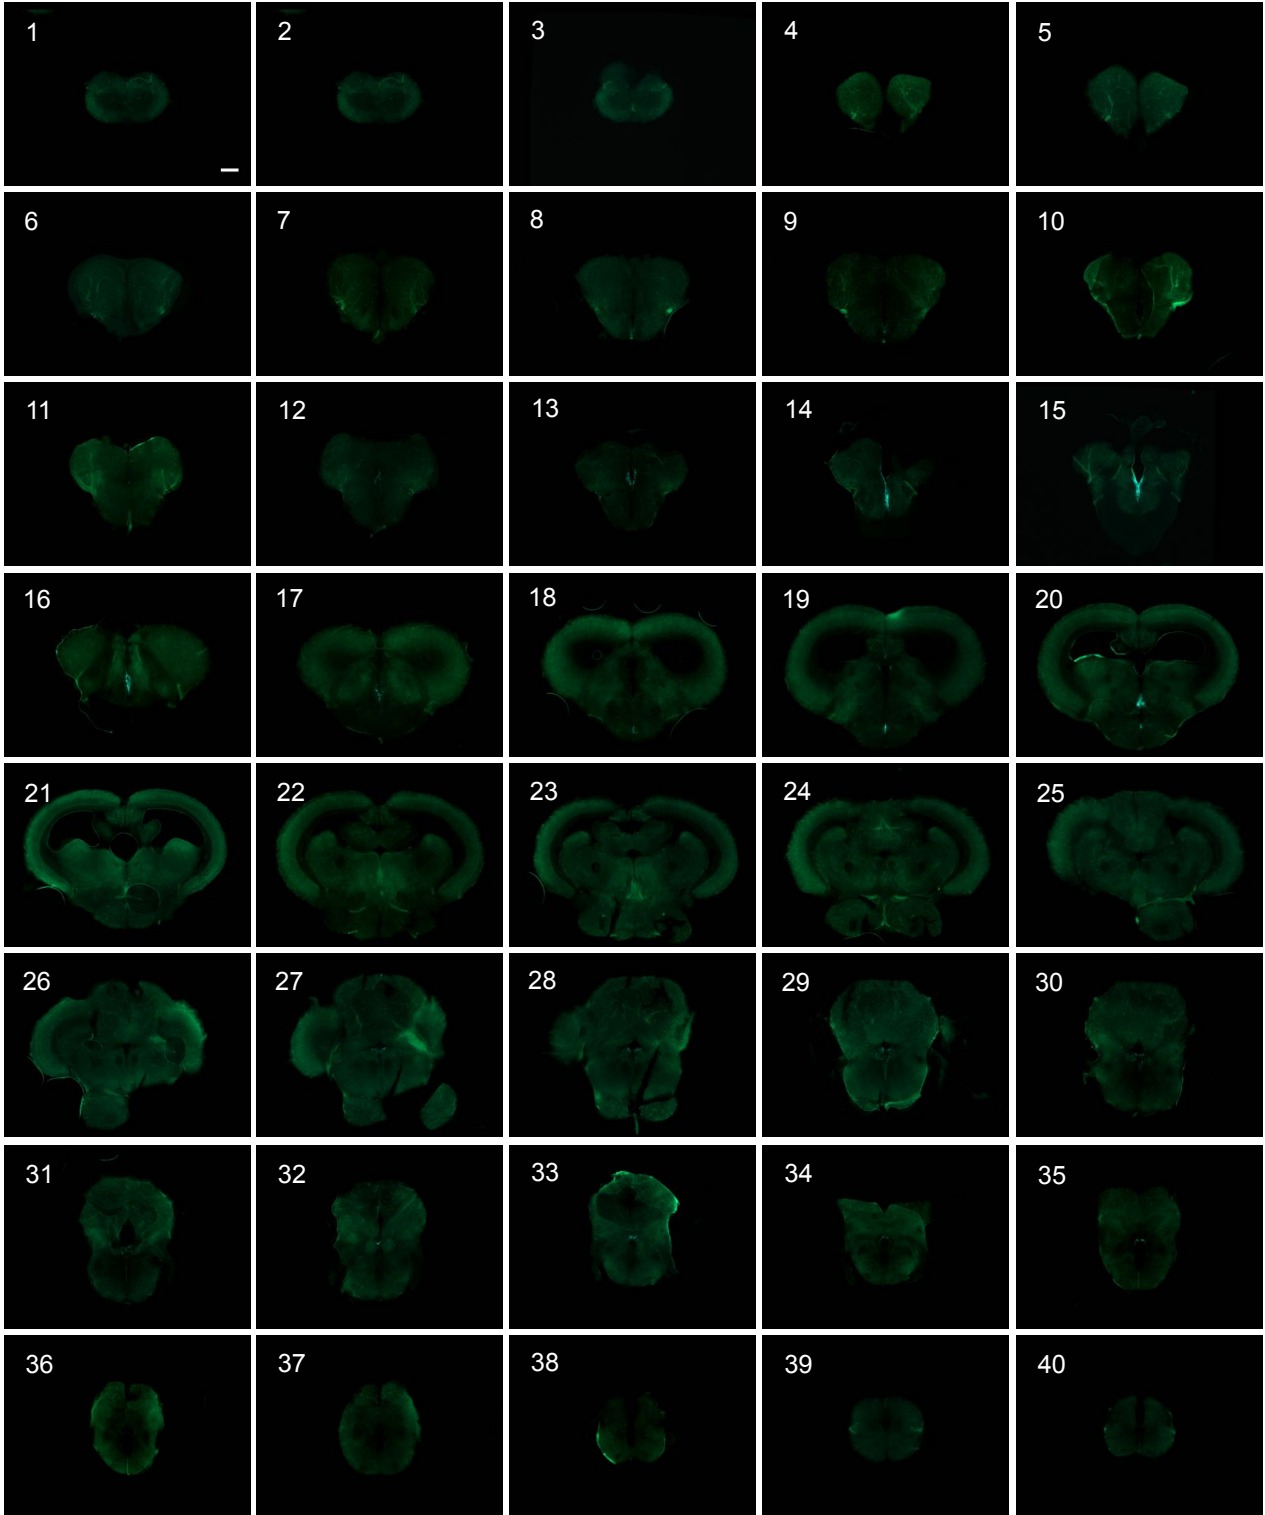

**b**

hspGGFF20A

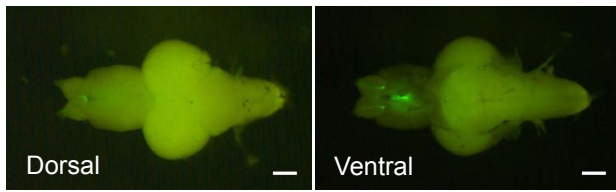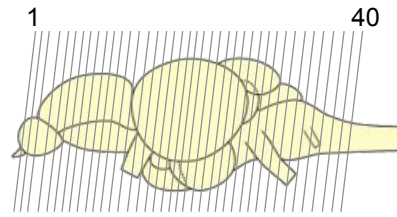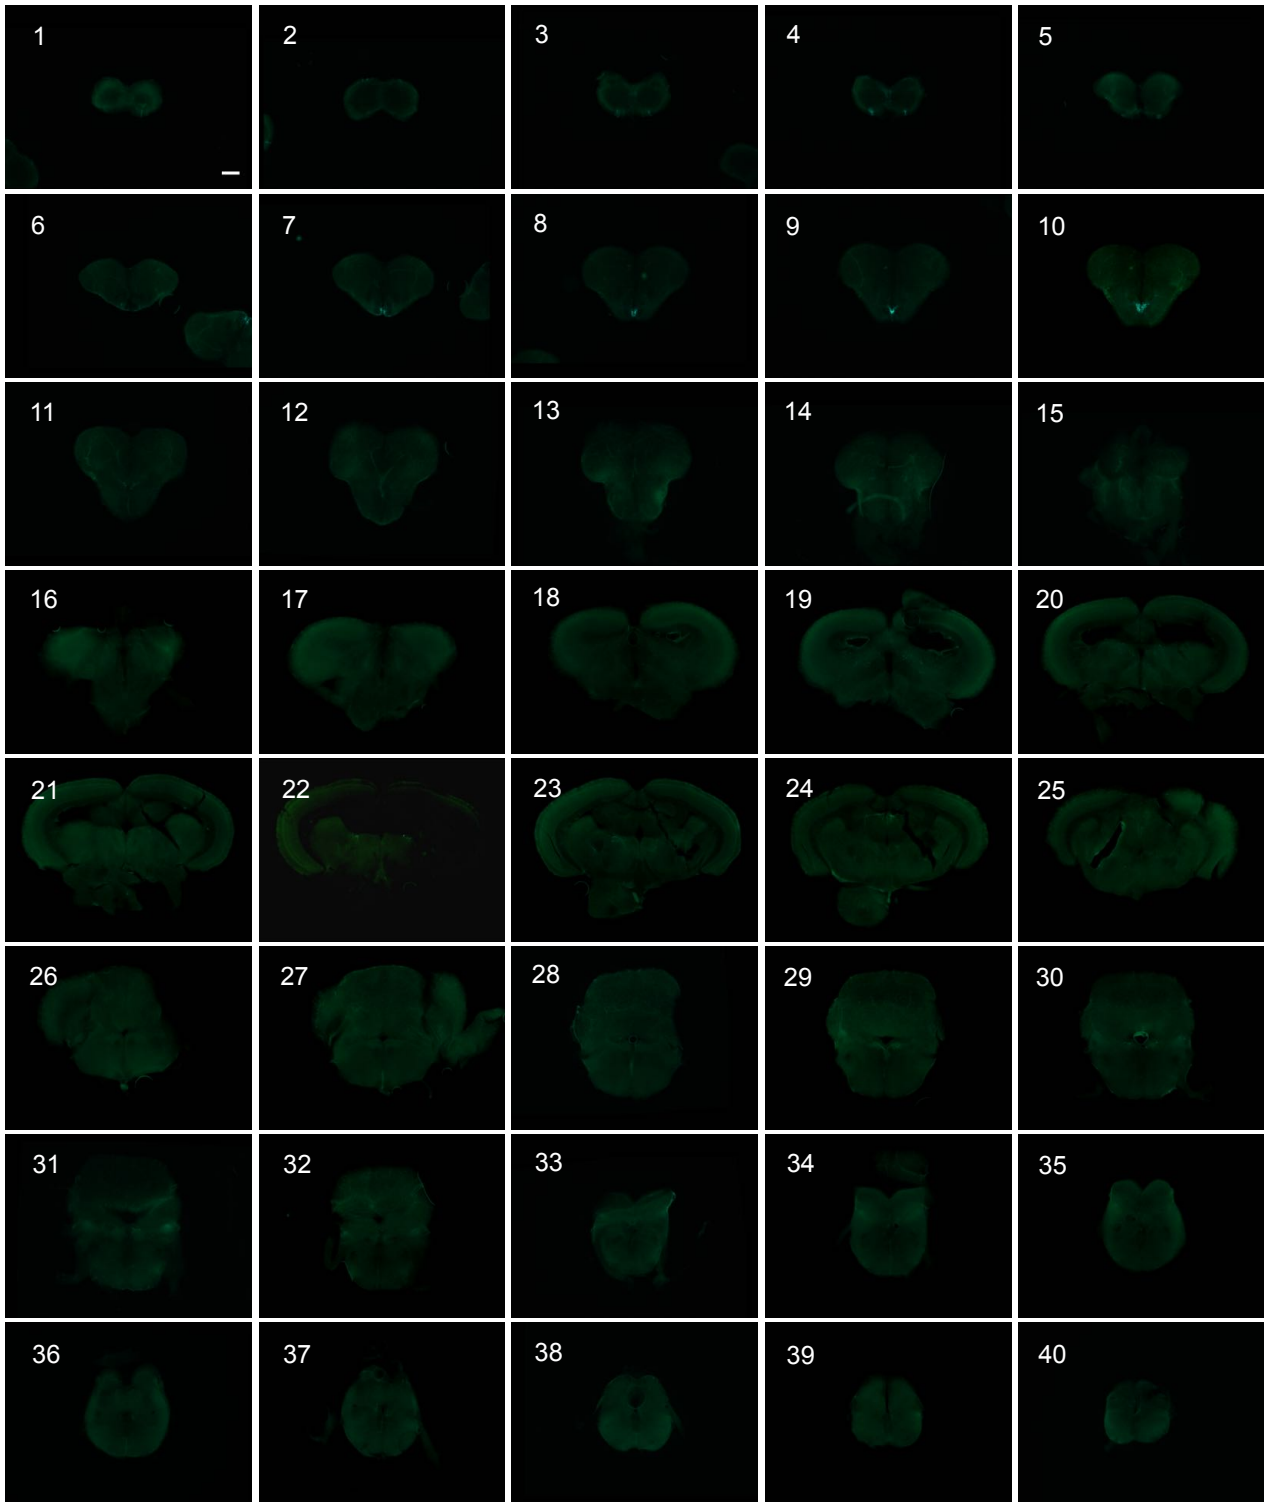

**c**

hspGFF38B

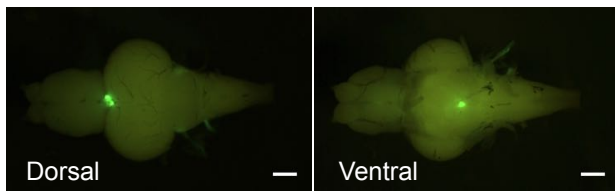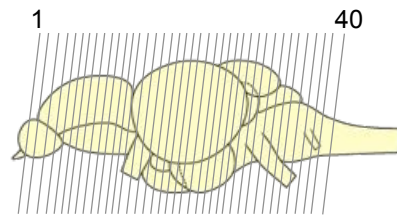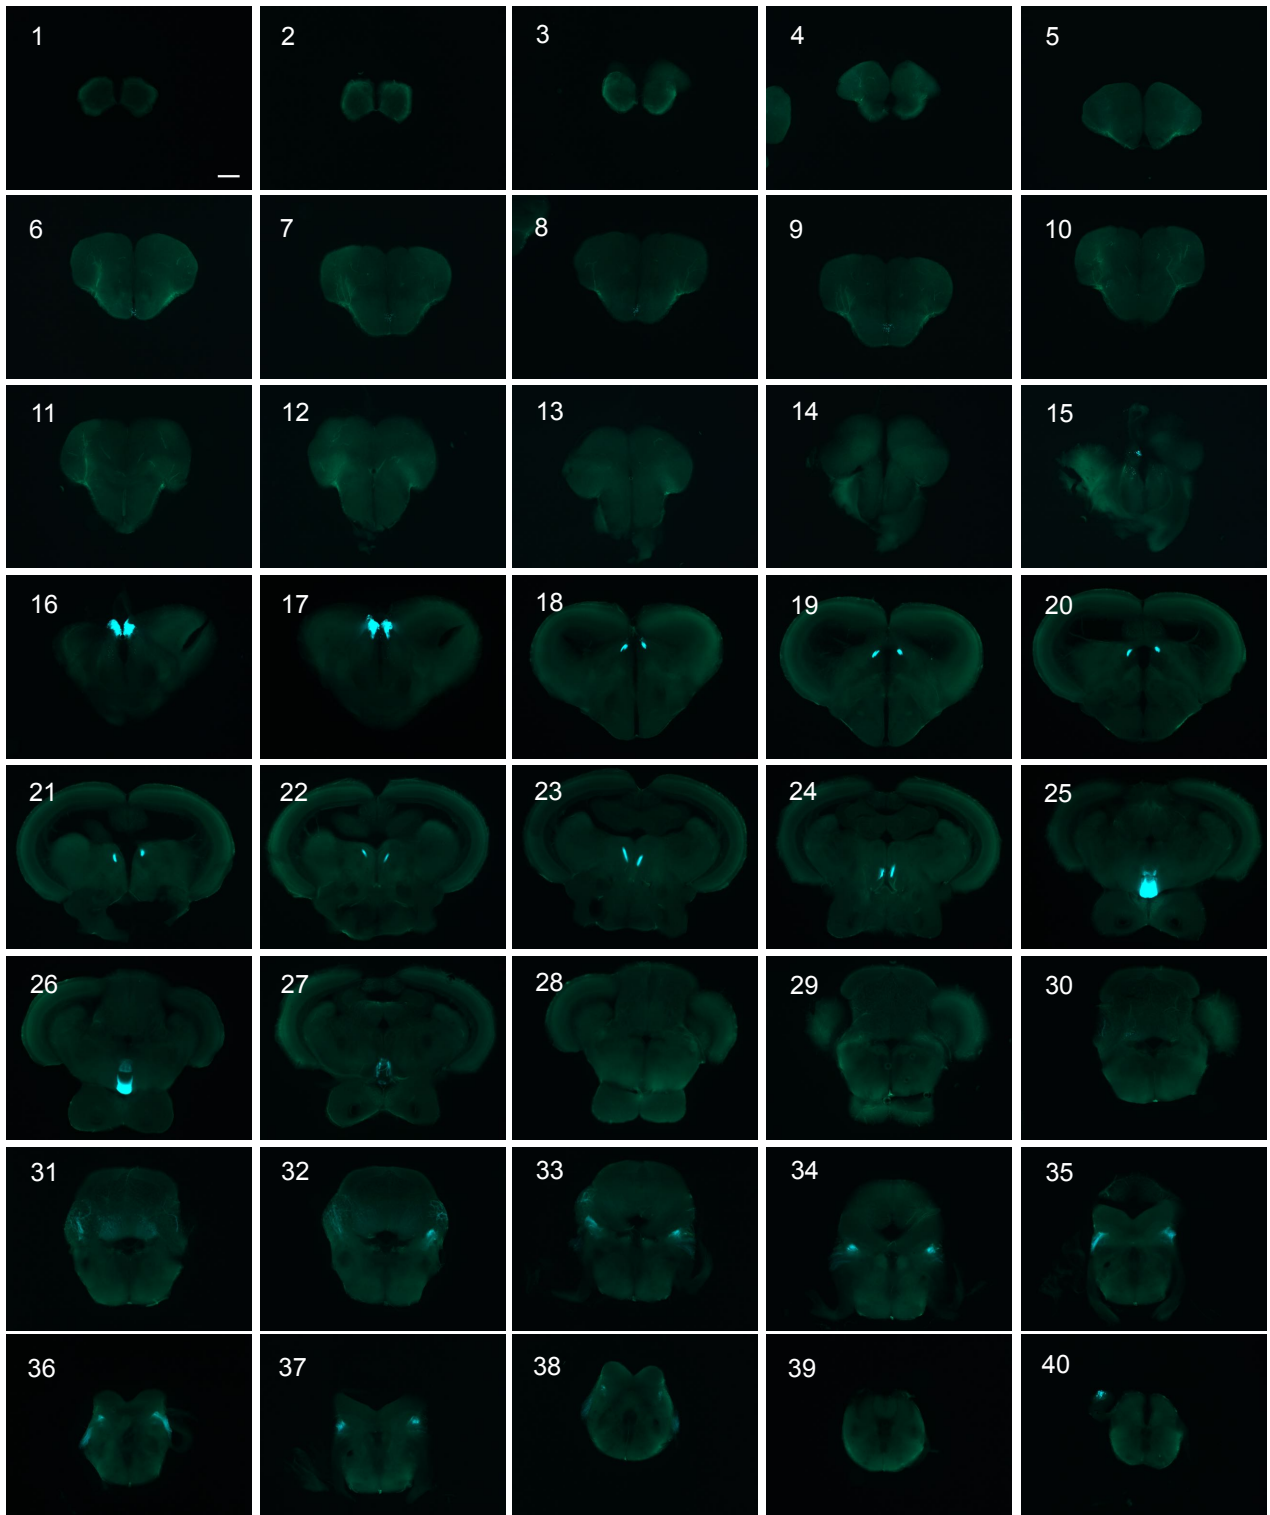

d

hspGFF55B

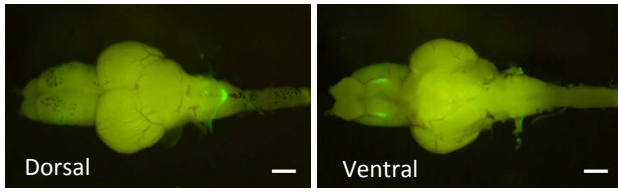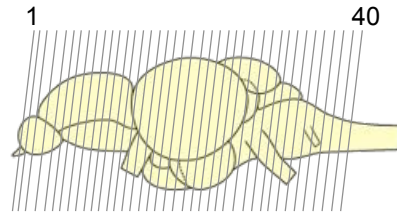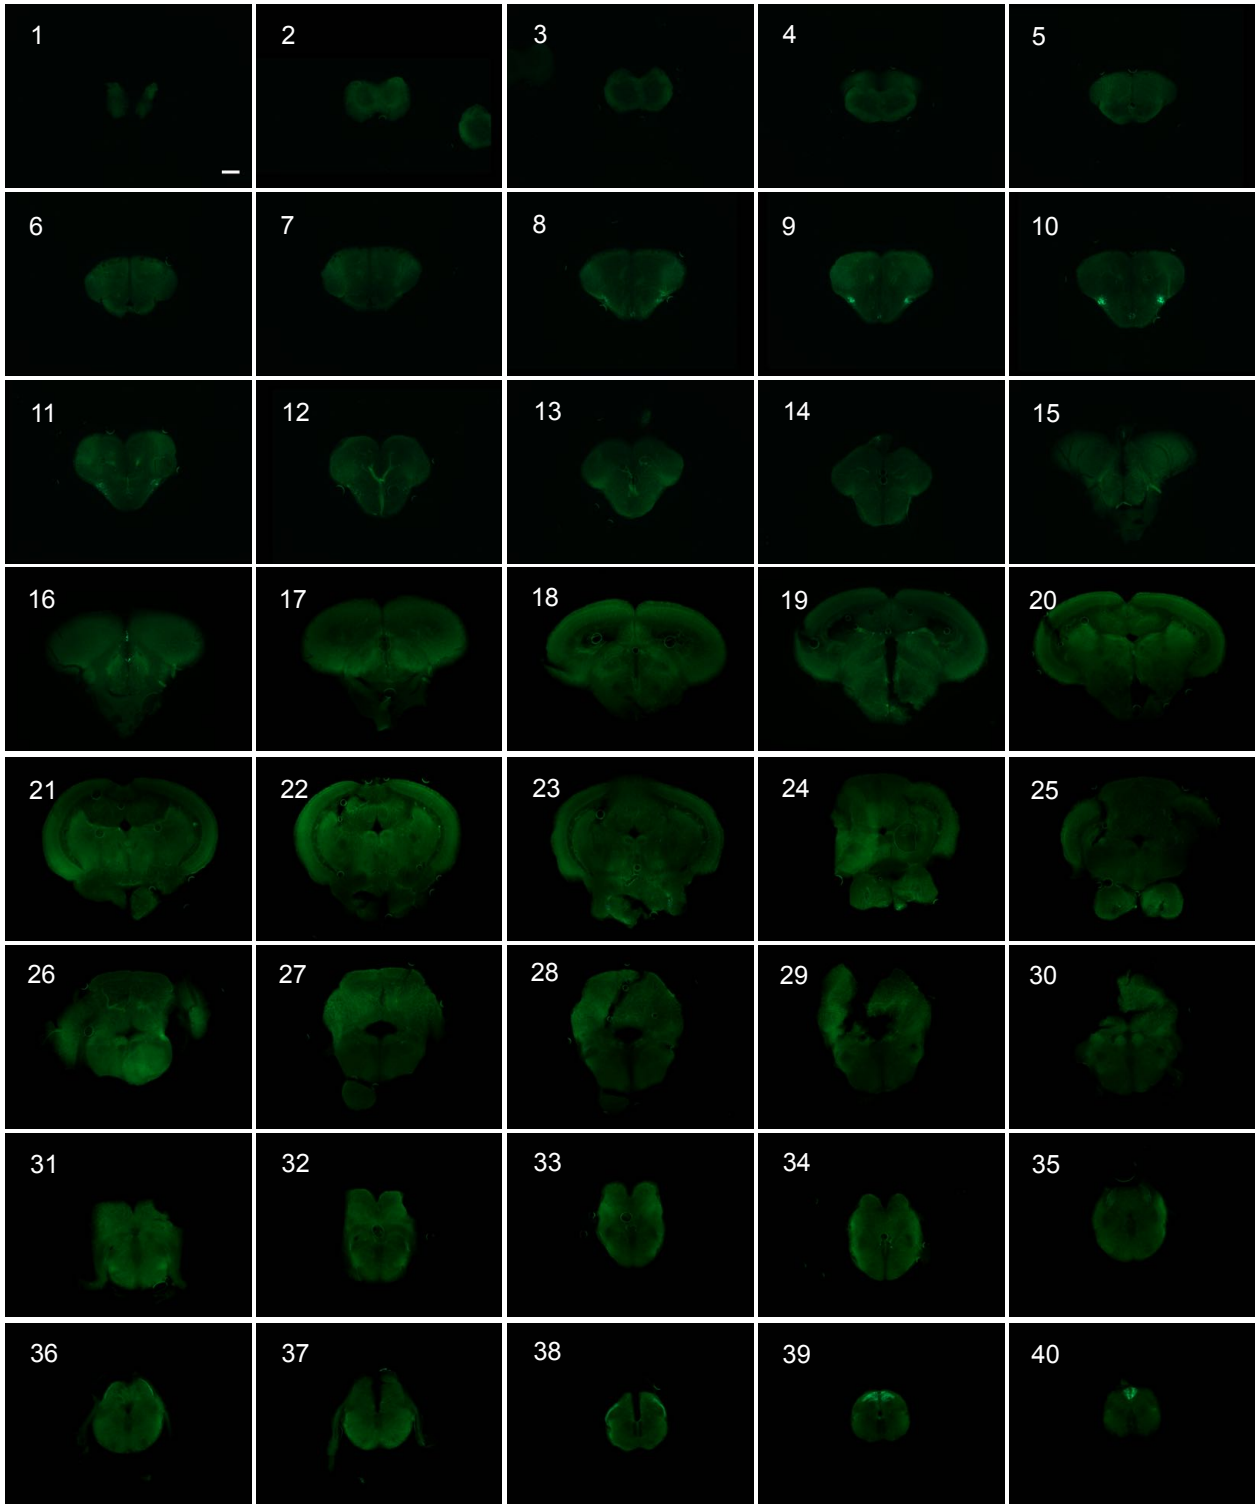

e

SAGFF36B

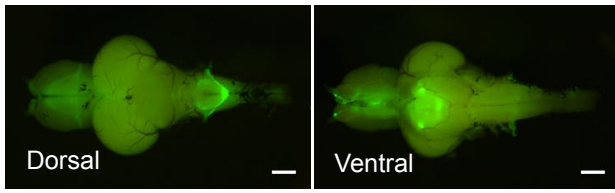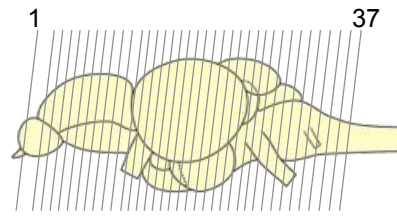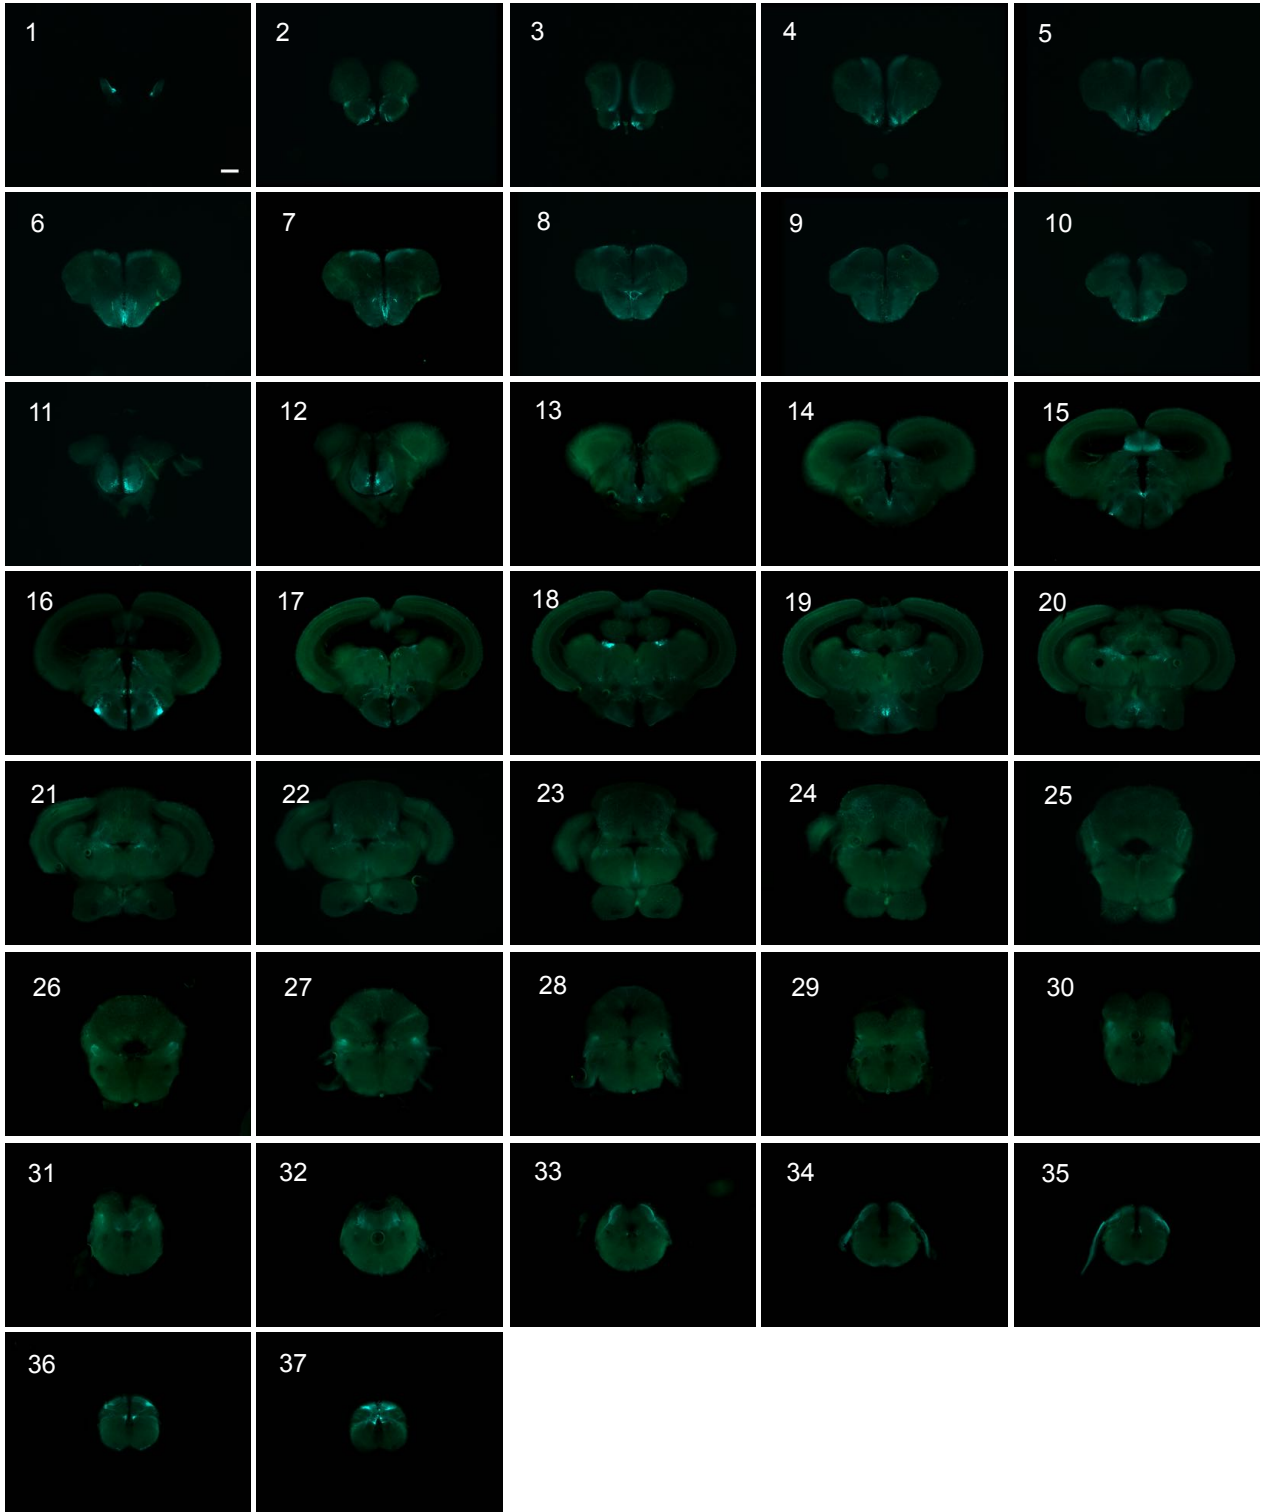



f

SAGFF70A

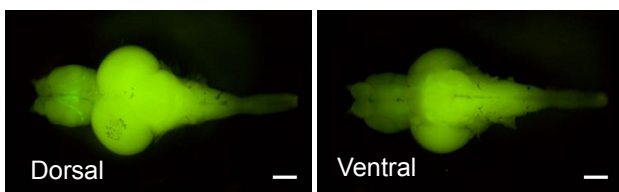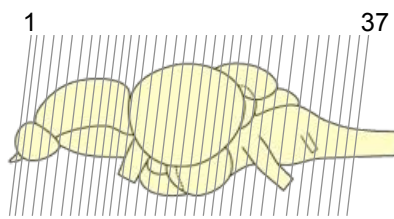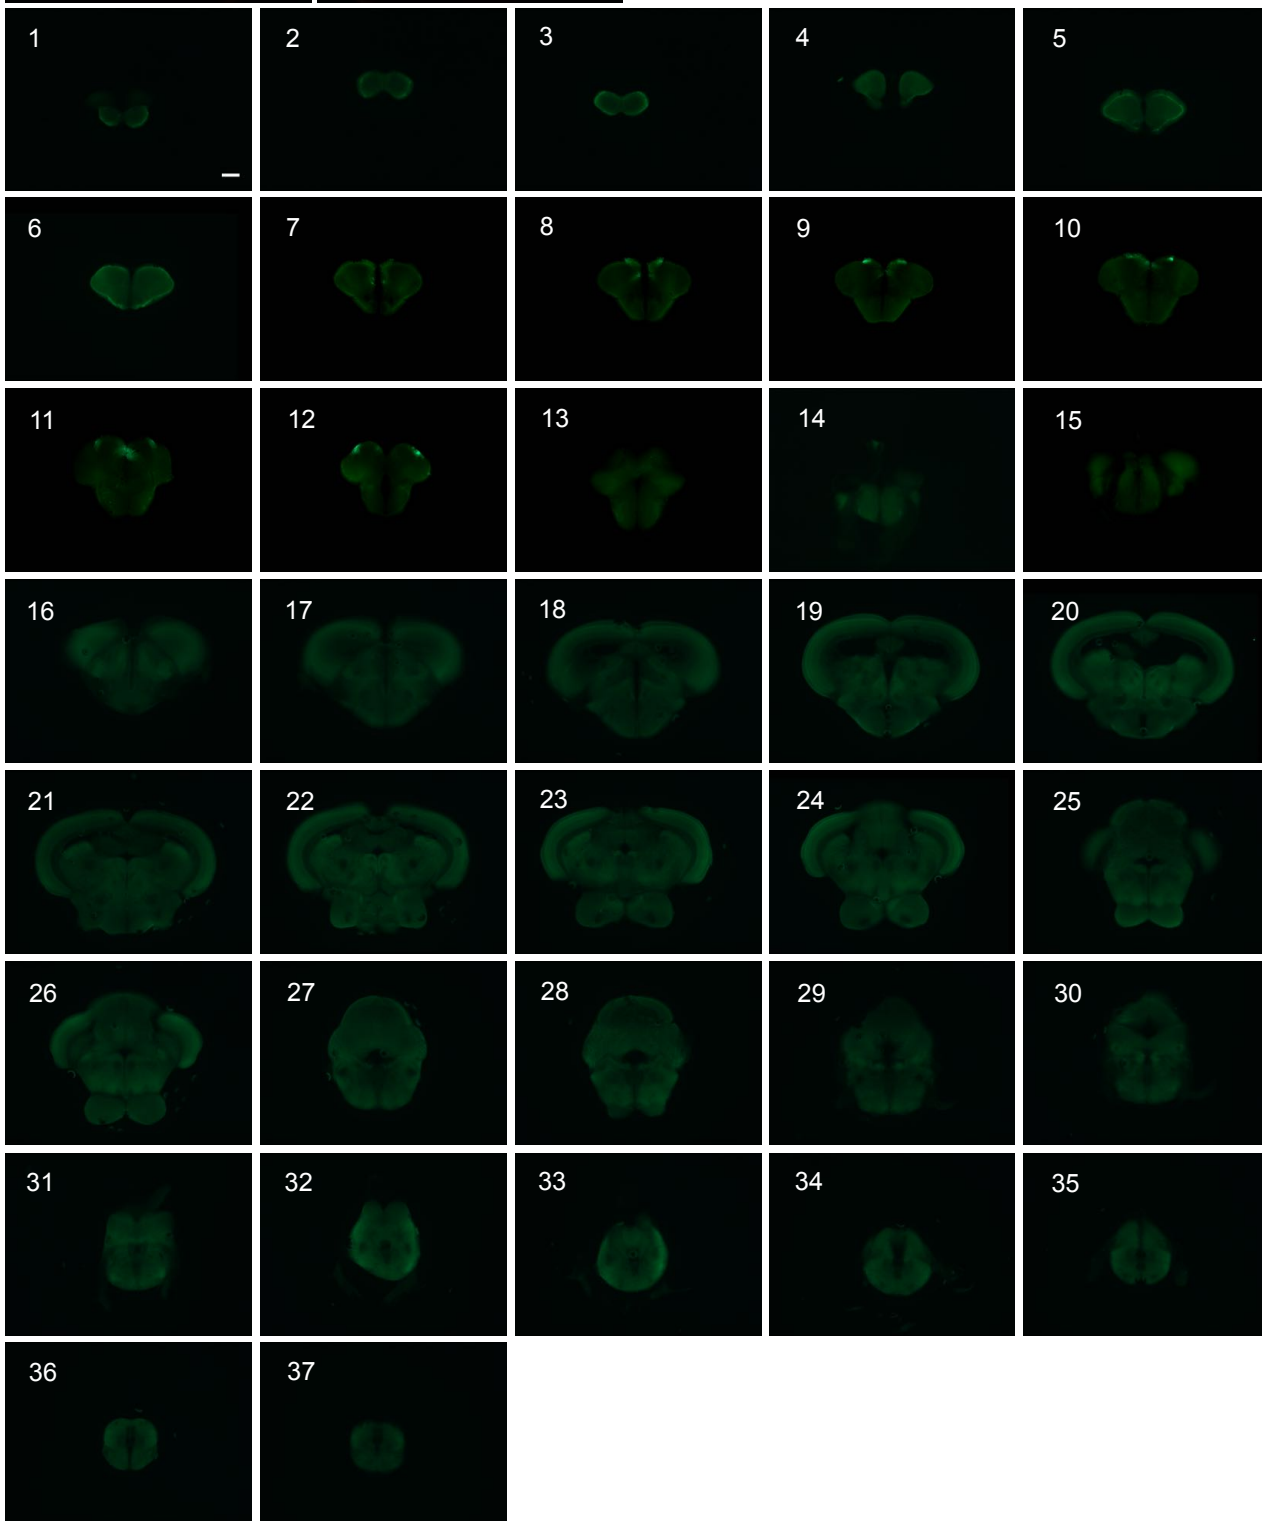

g

SAGFF81B

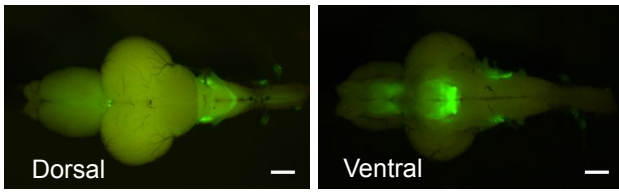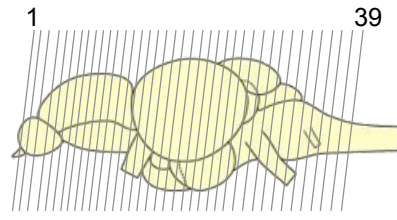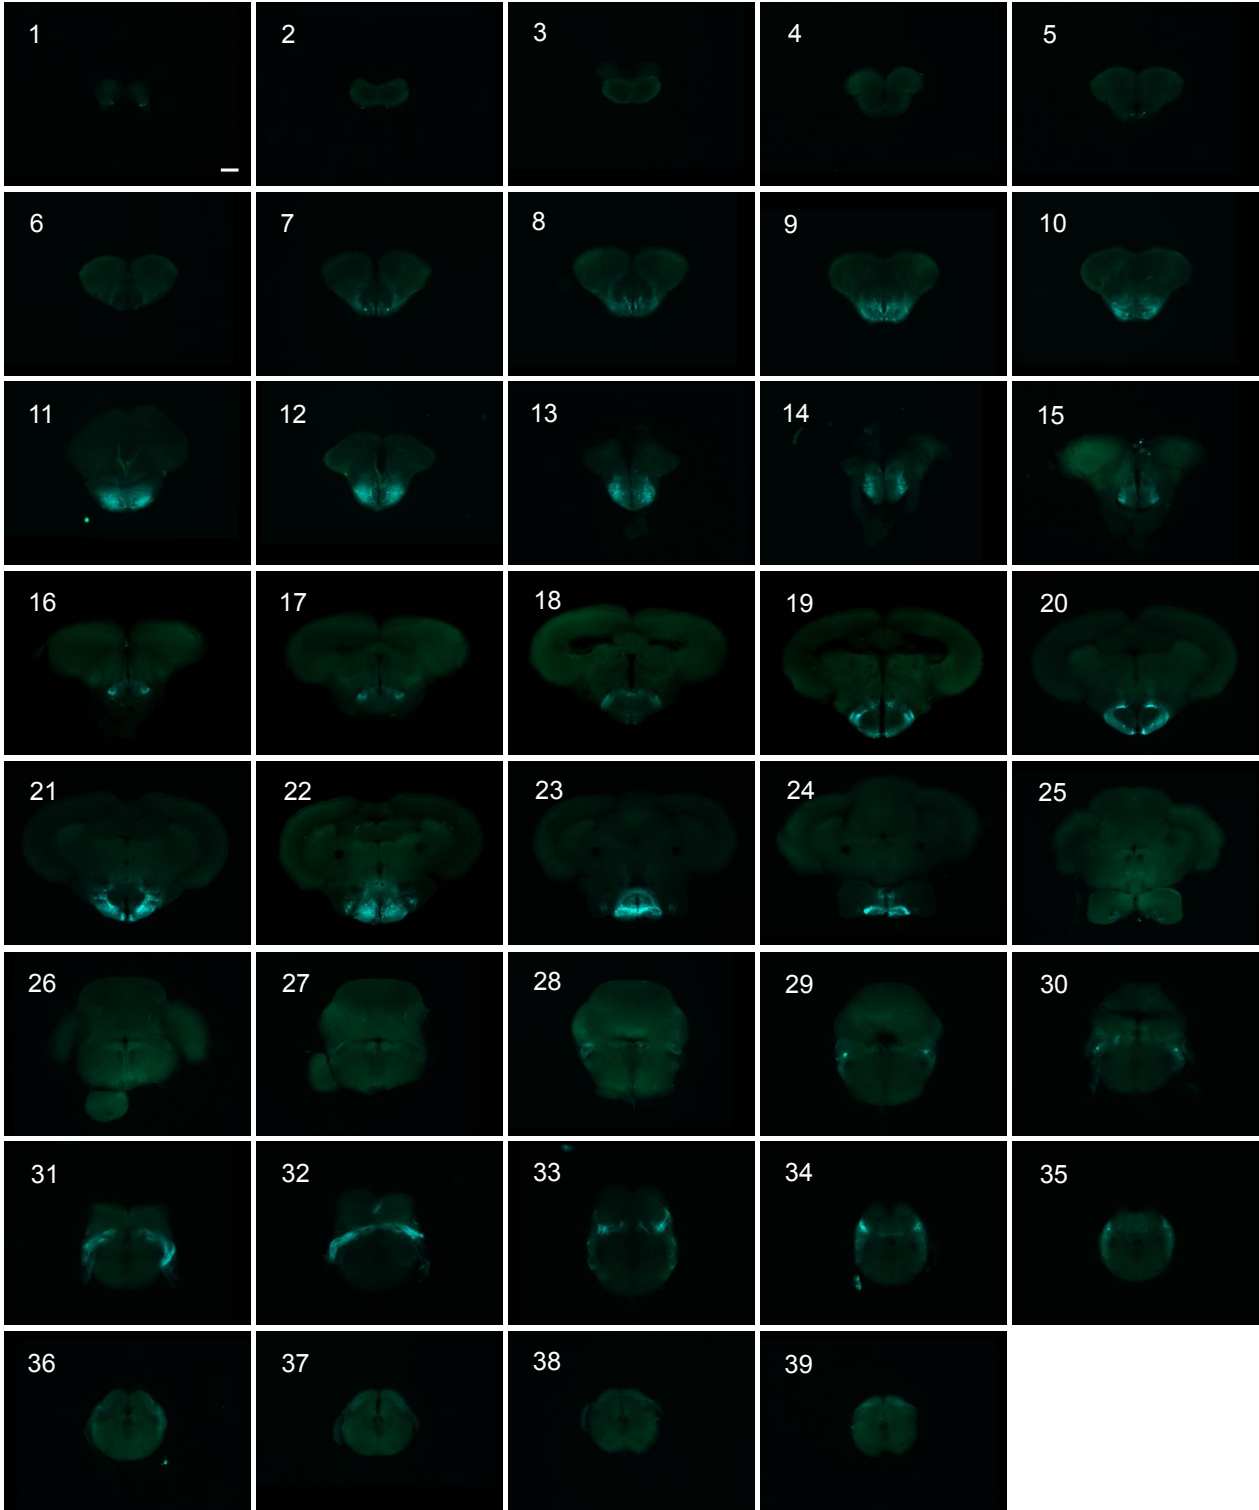



h

SAGFF120A

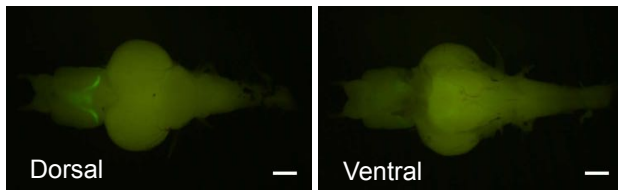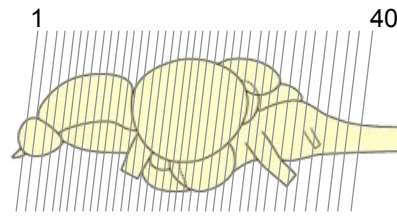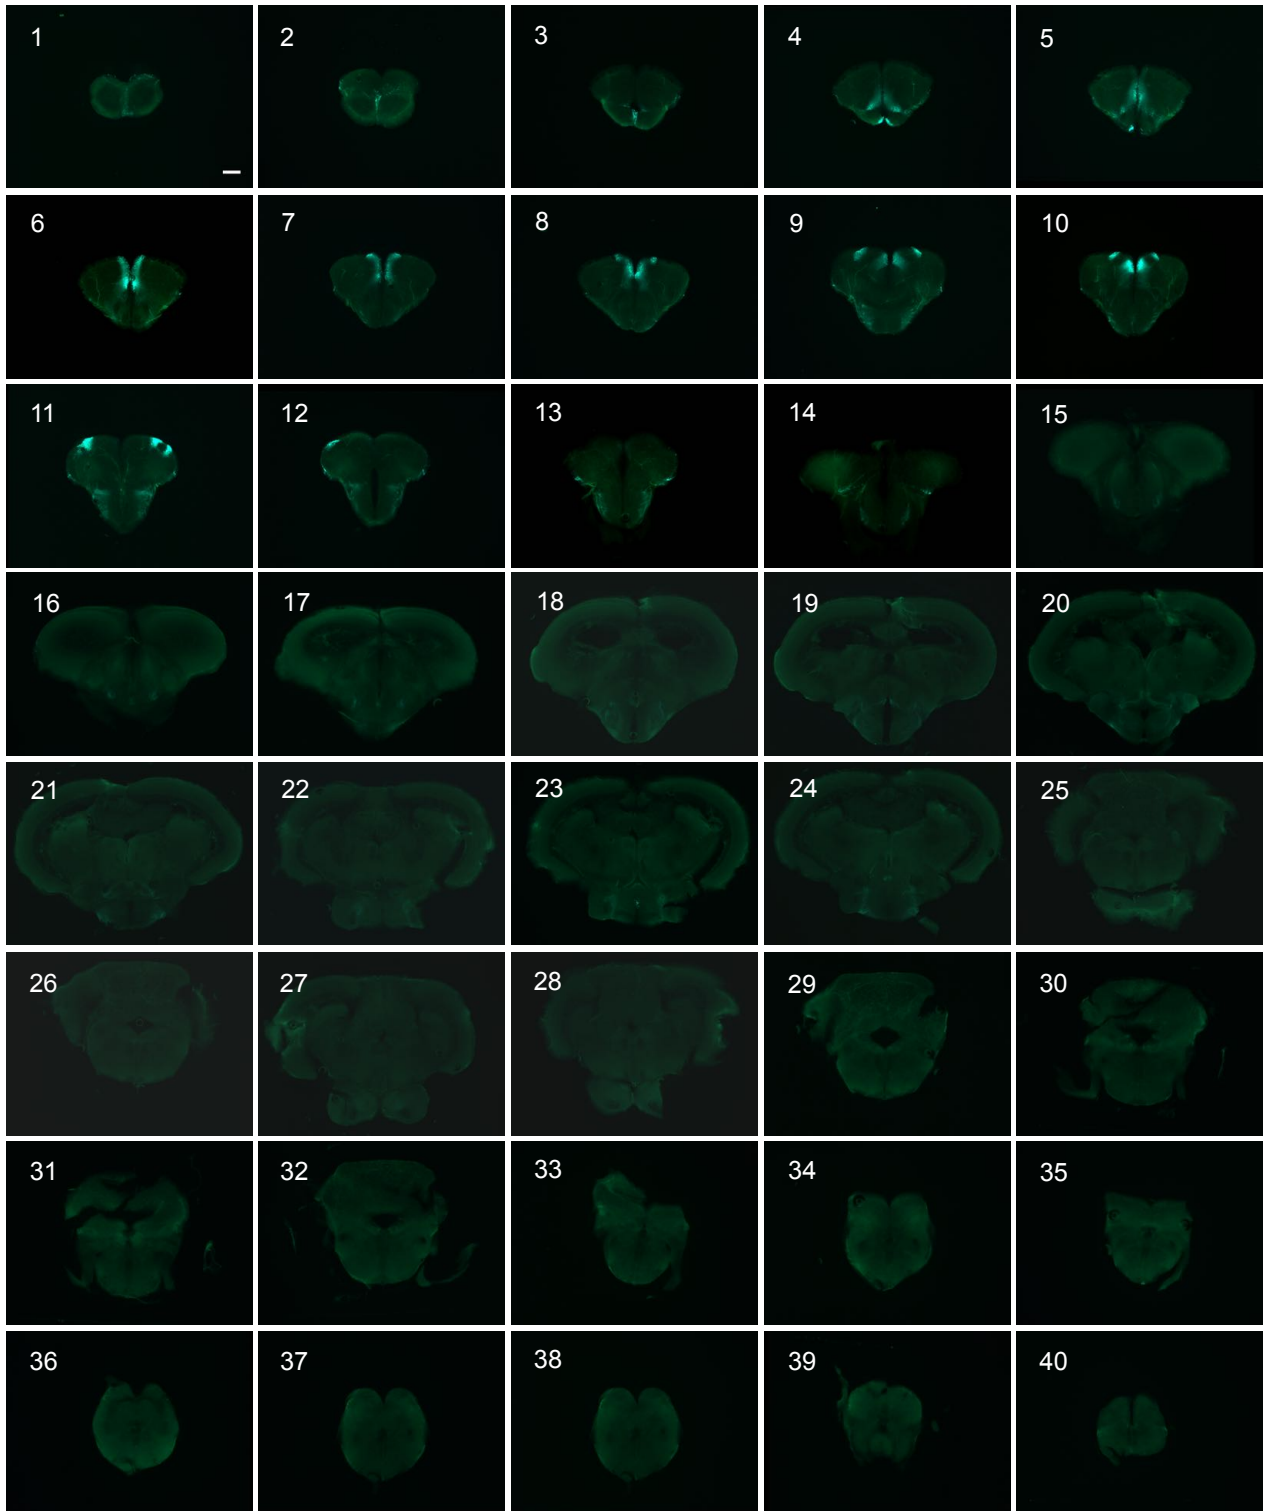

i

SAGFF226F

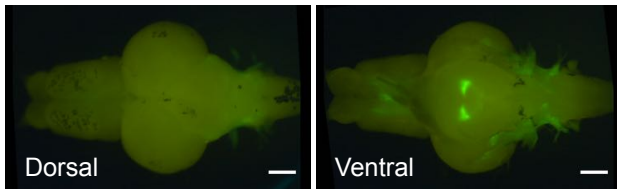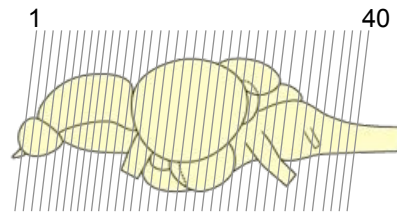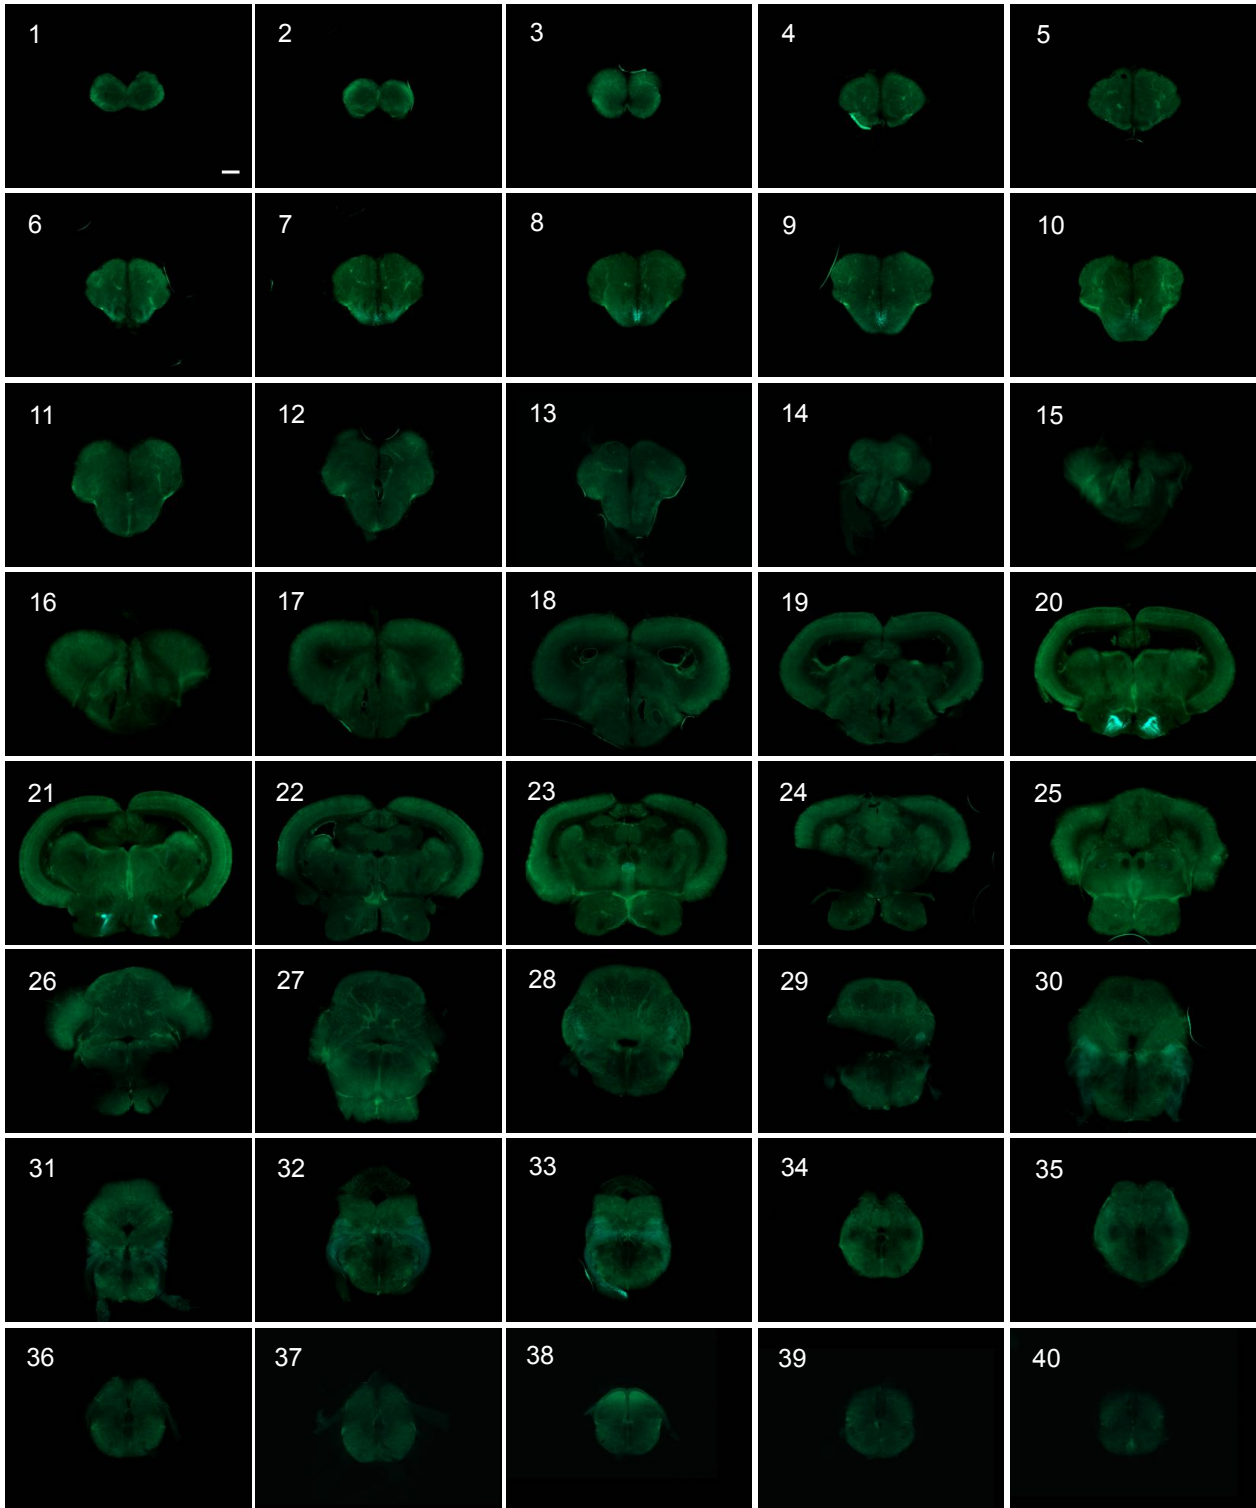

j

SAGFF228A

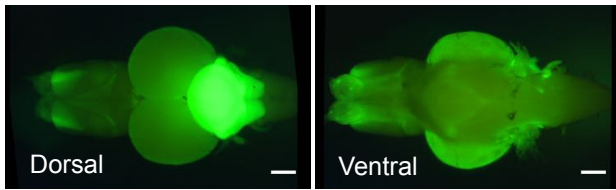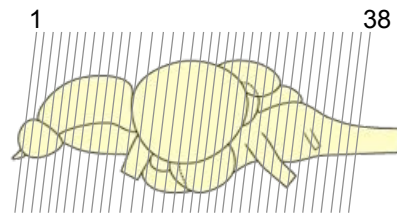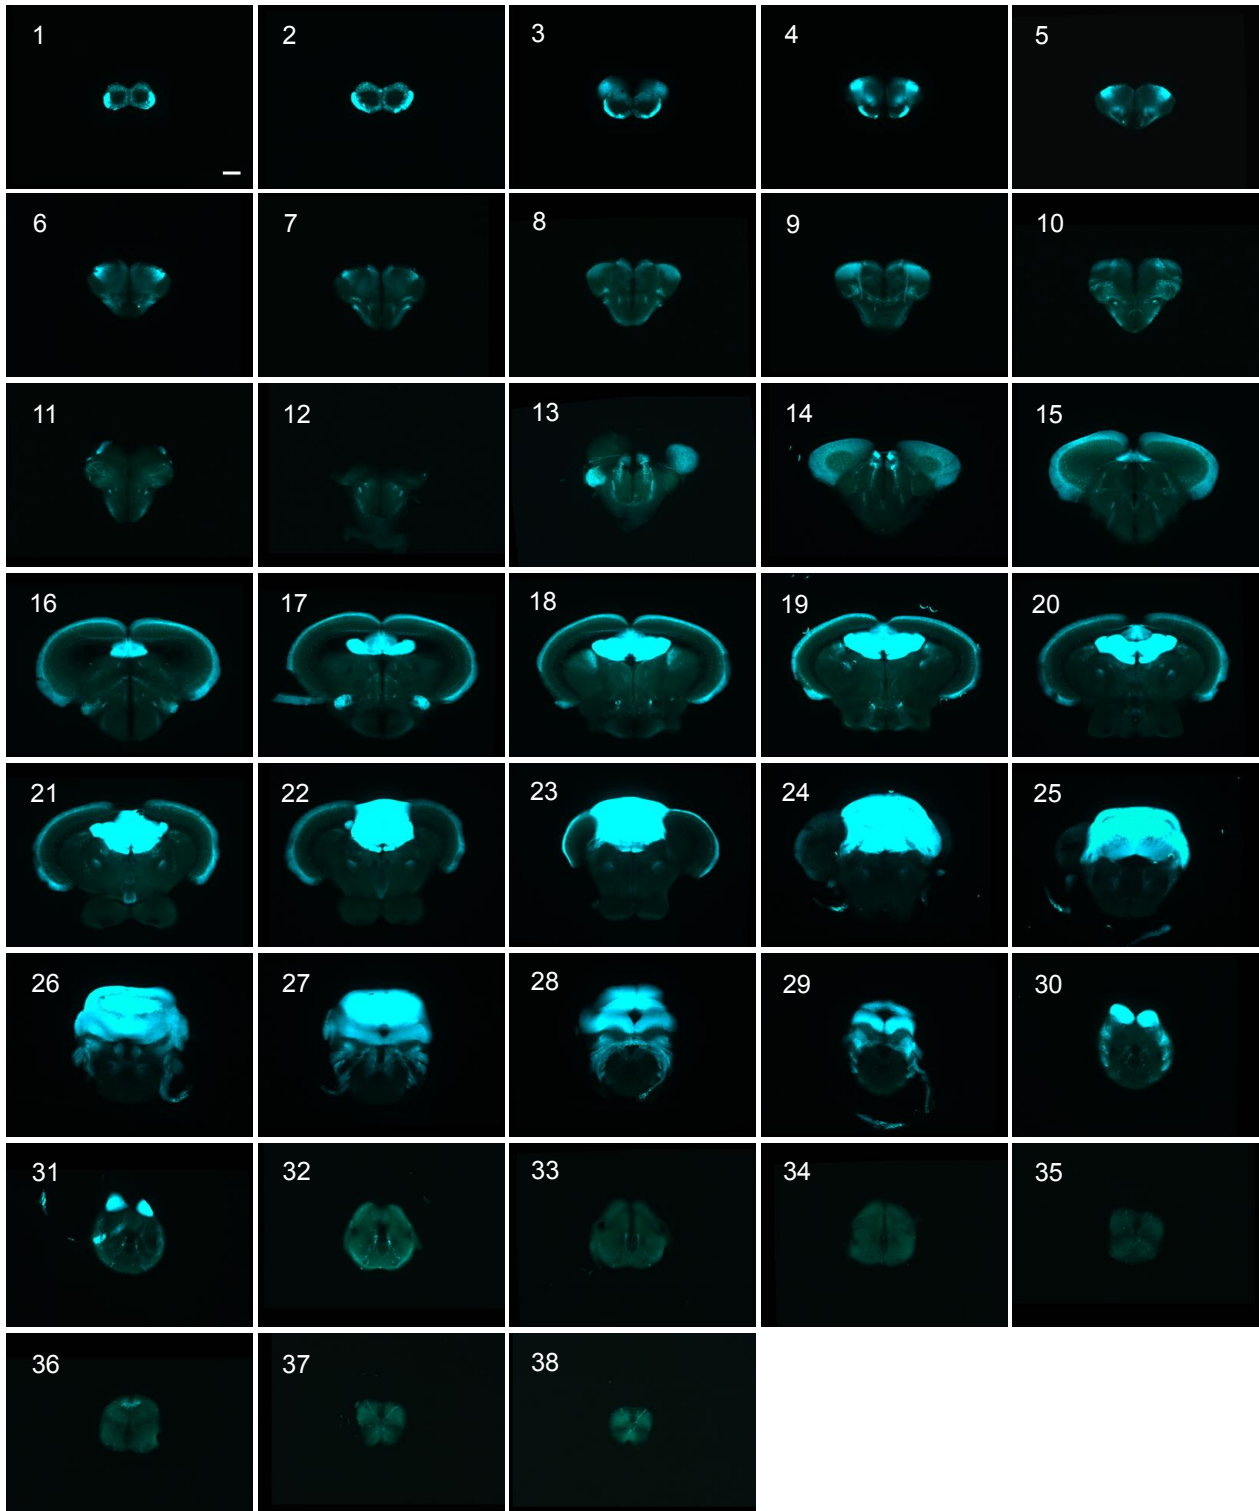

k

SAGFF231A

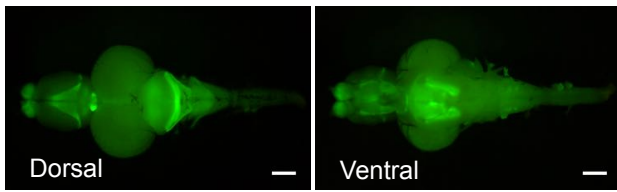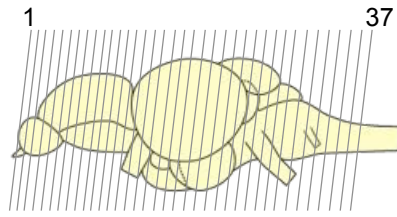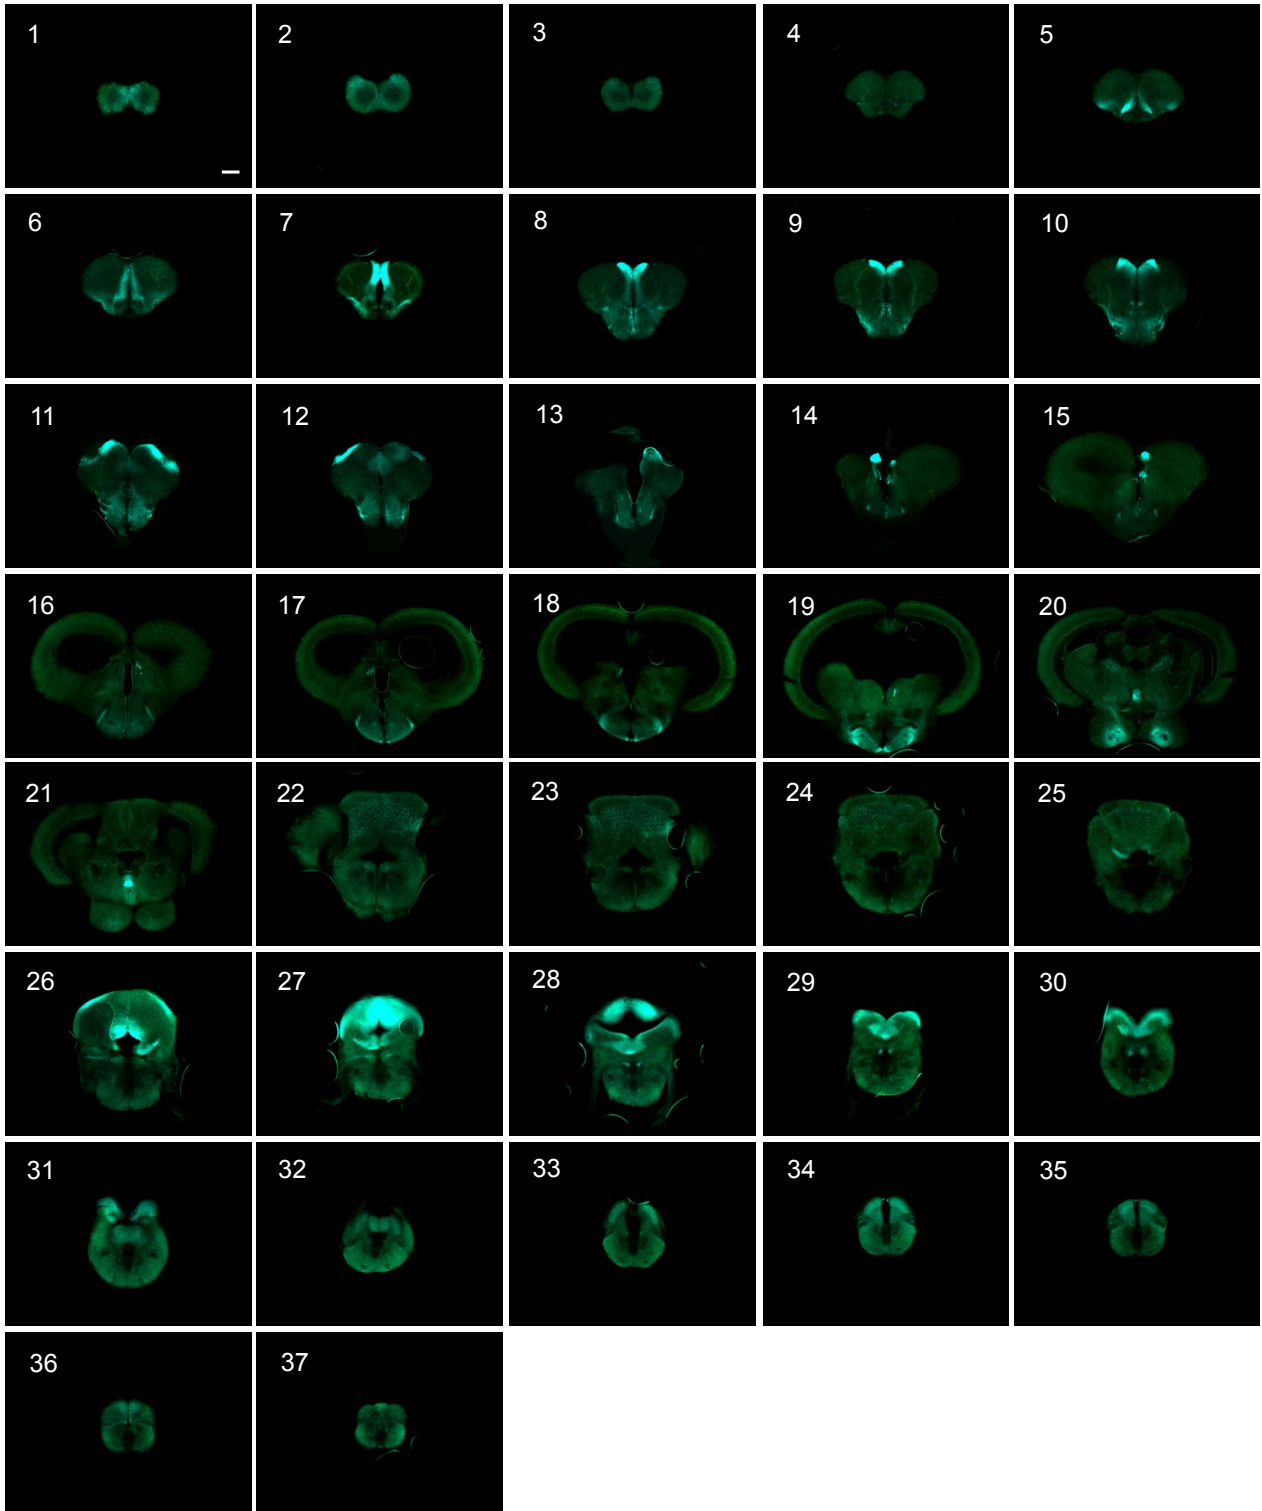

SAGFF233A

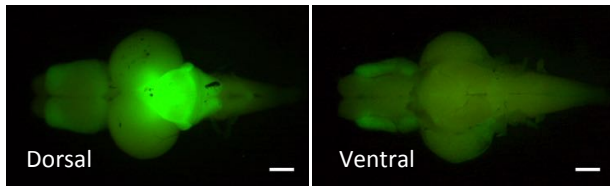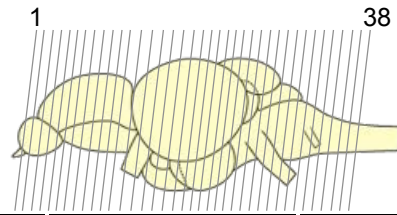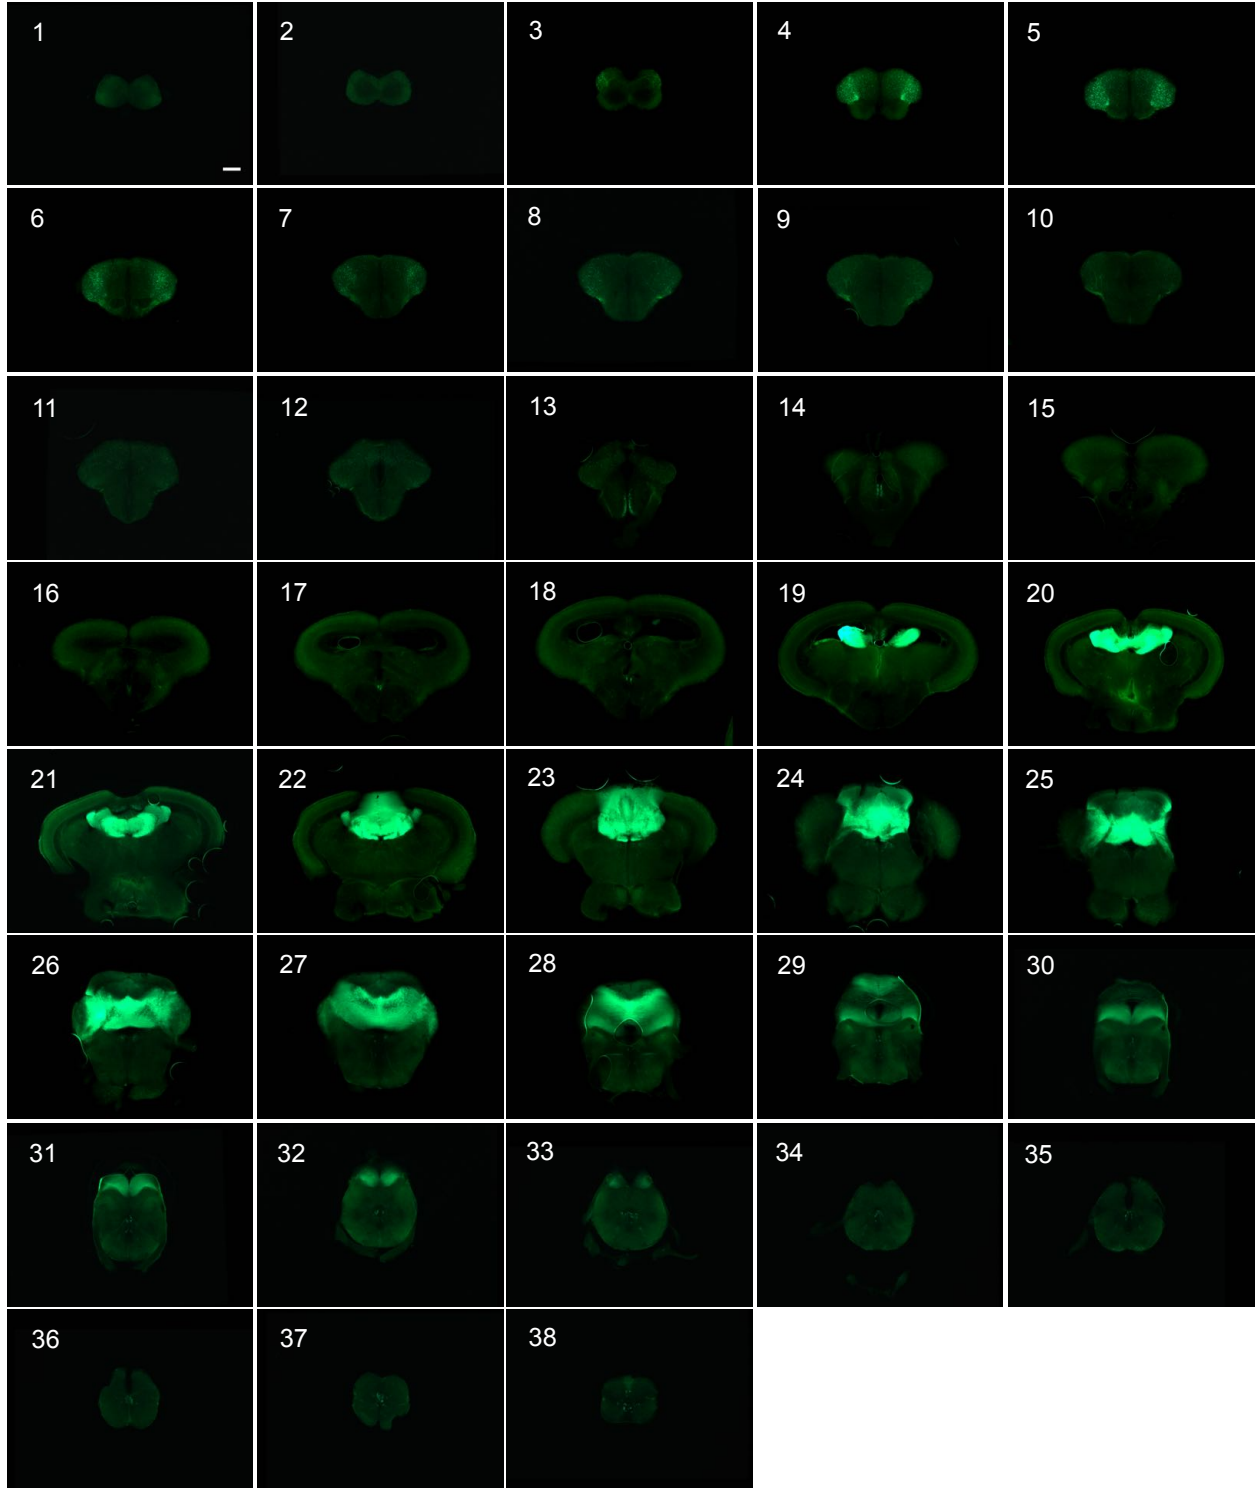



m

SAGFF234A

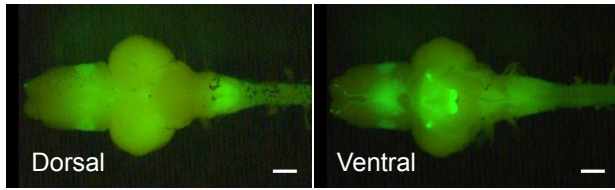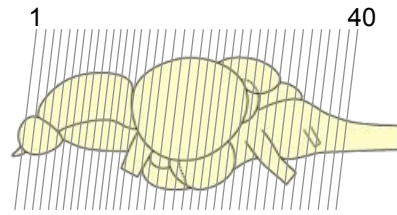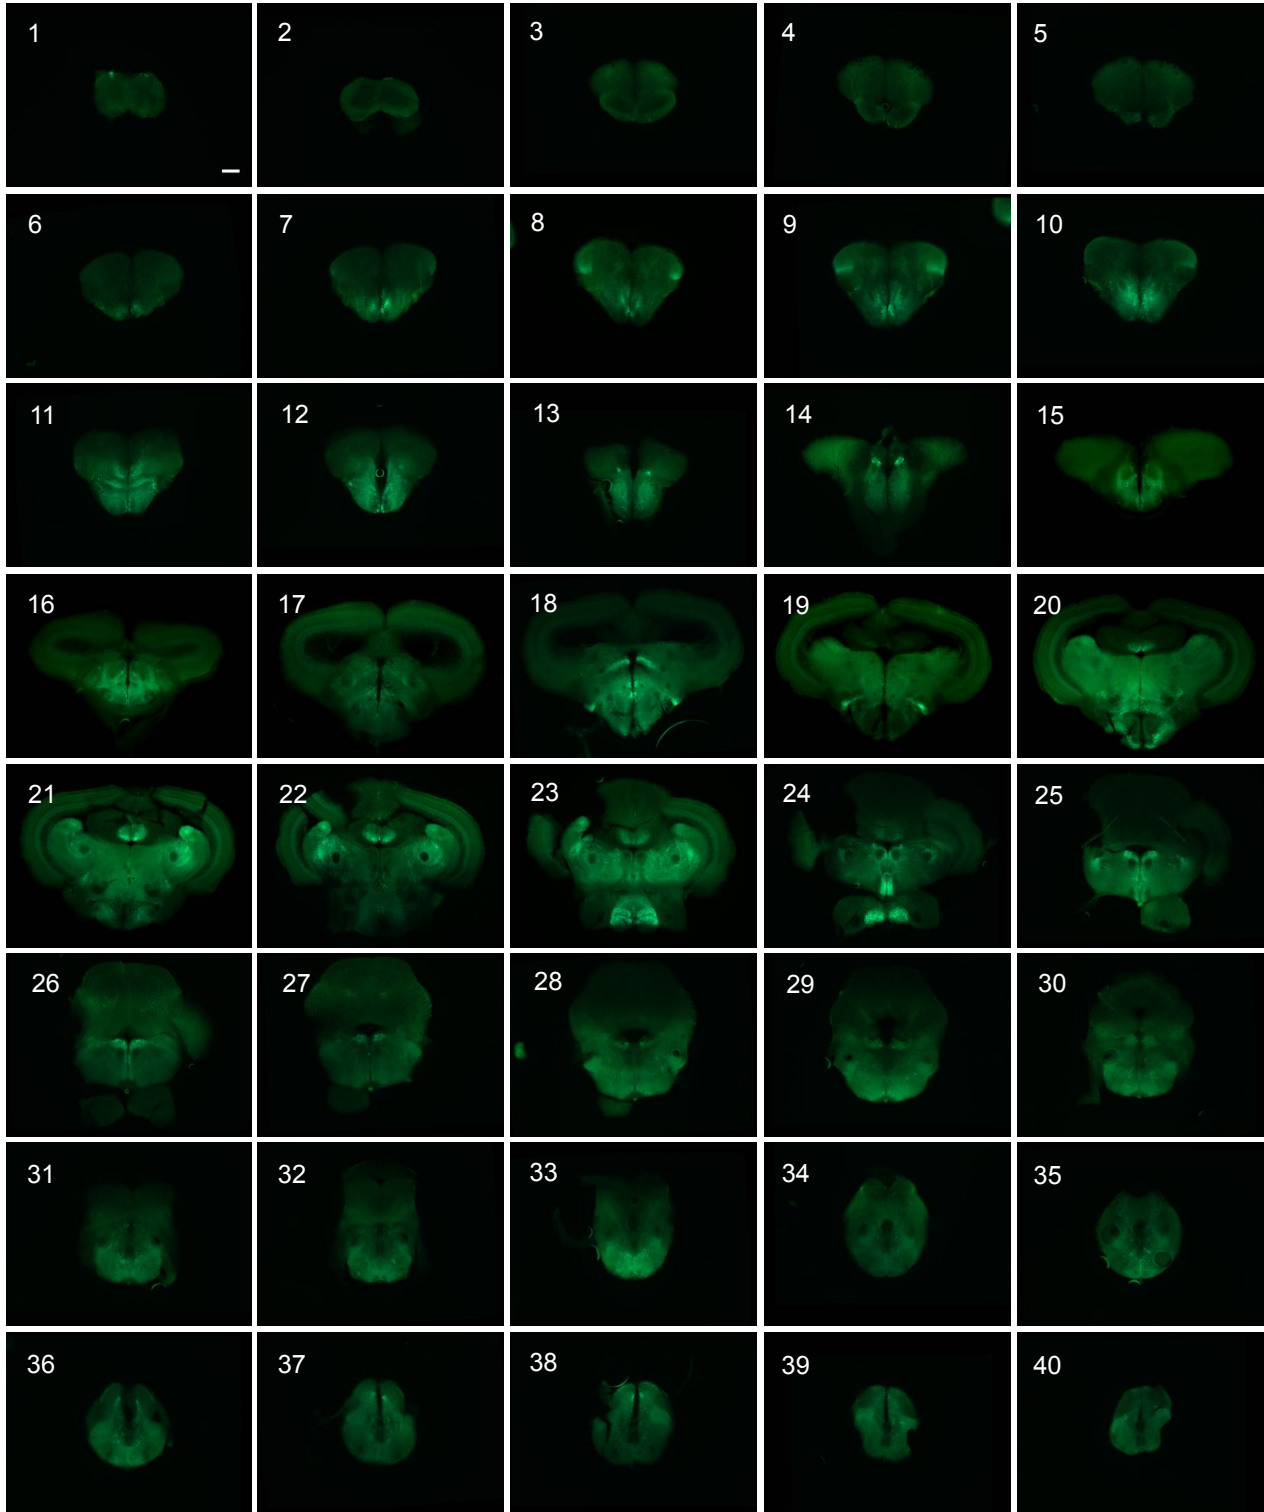



n

SAGFF234D

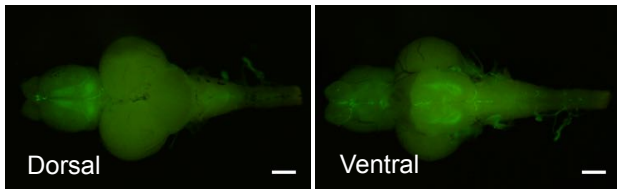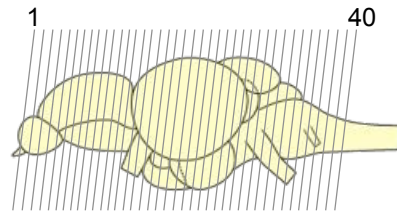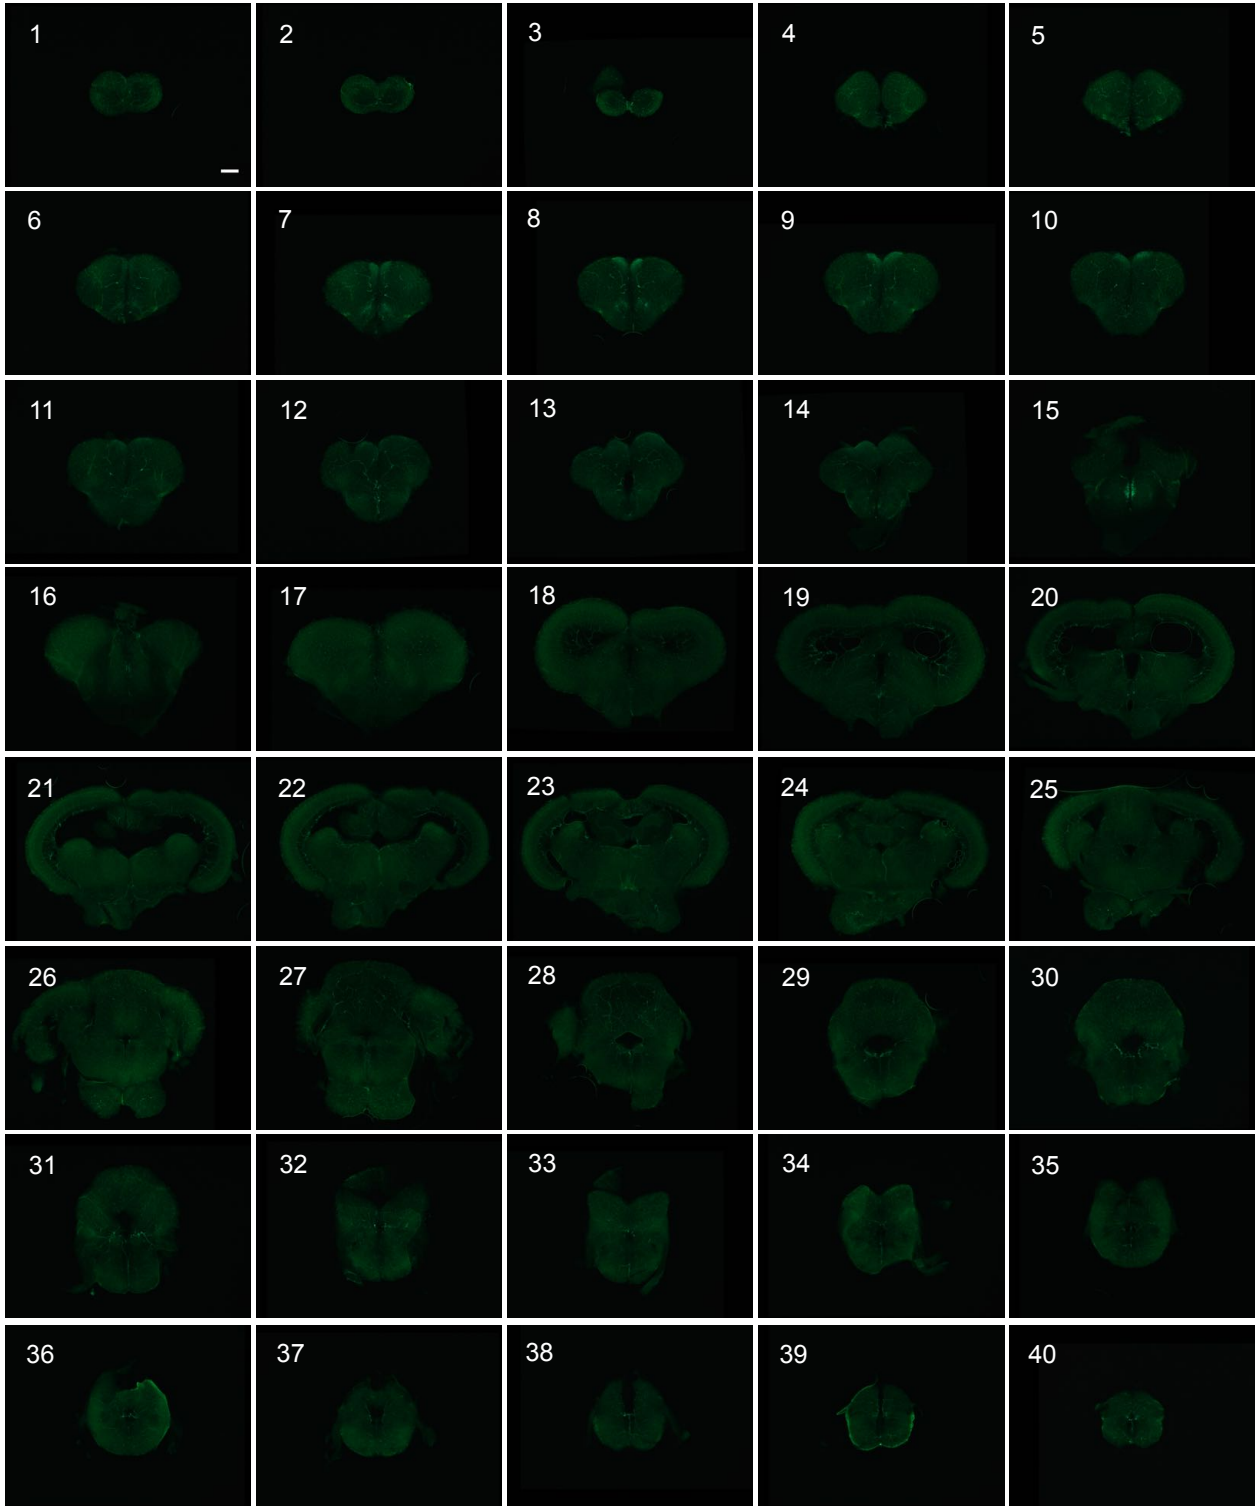

O

hspGFFDMC12A

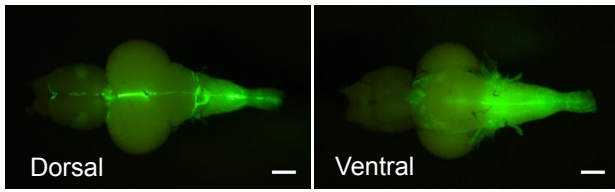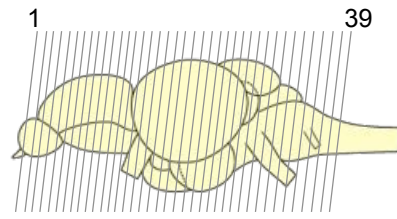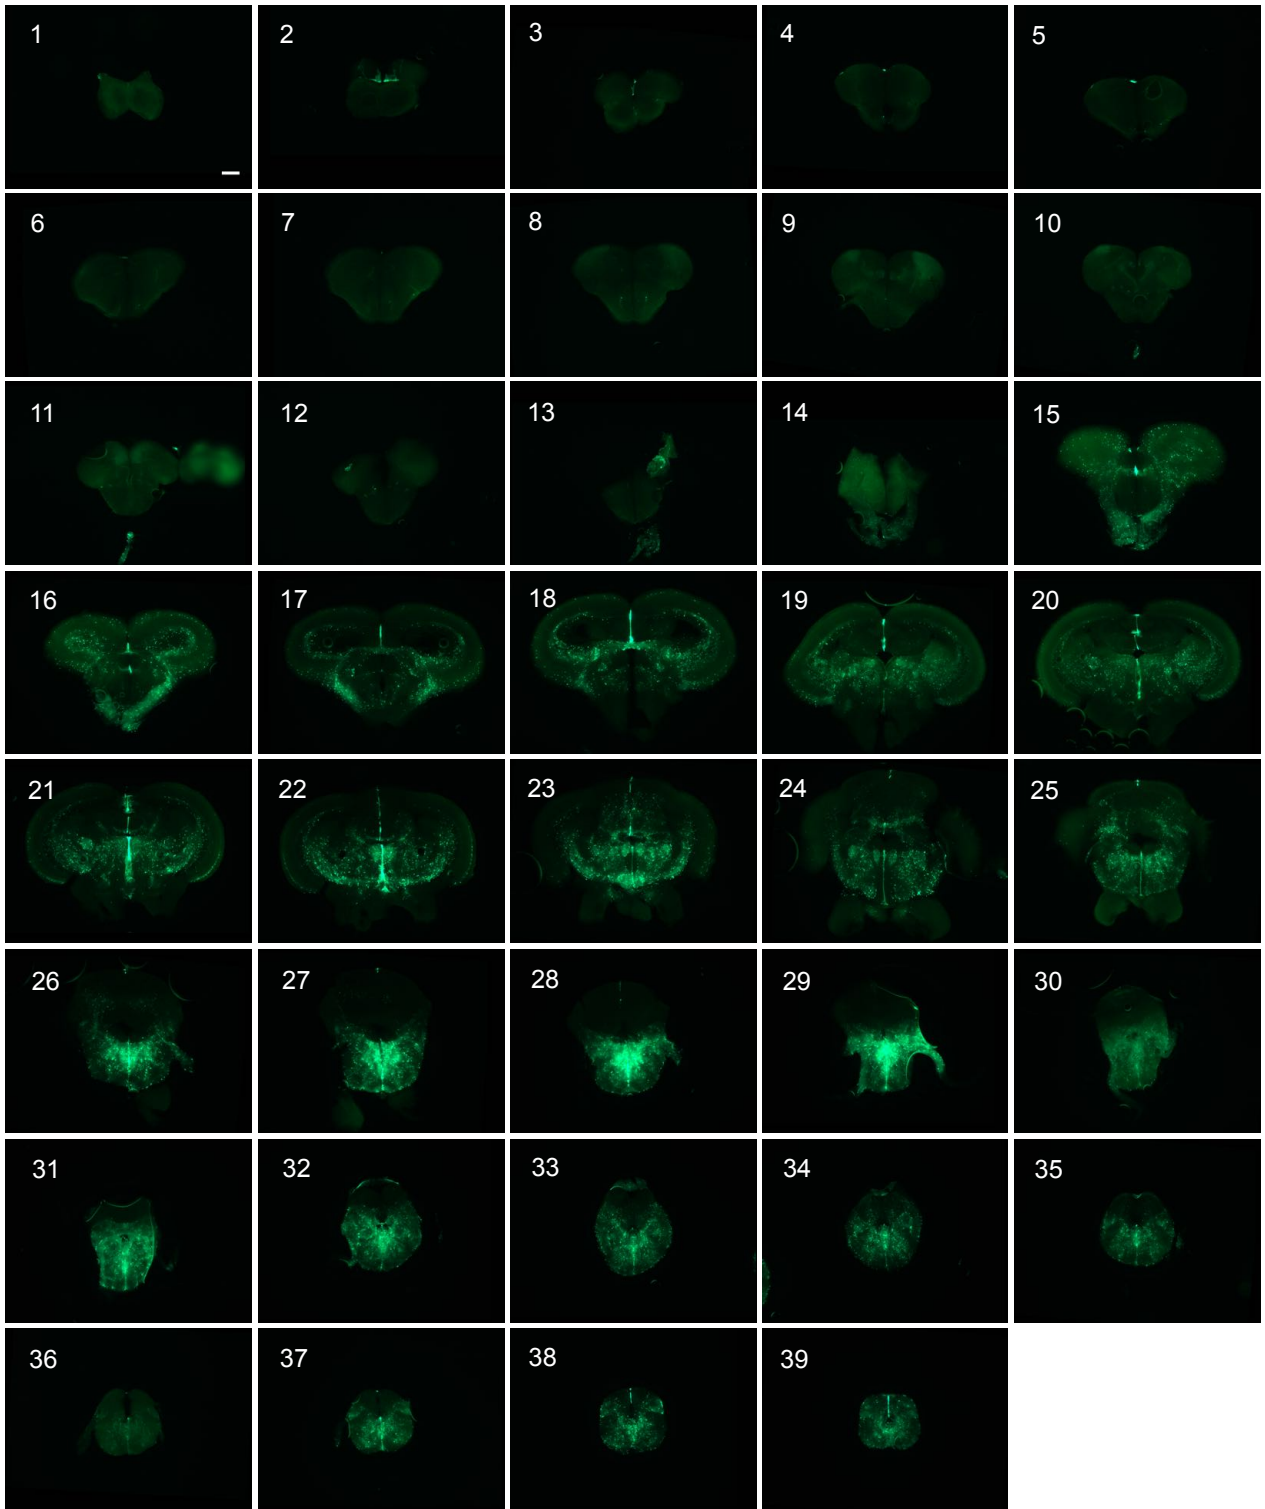

p

hspGFFDMC56B

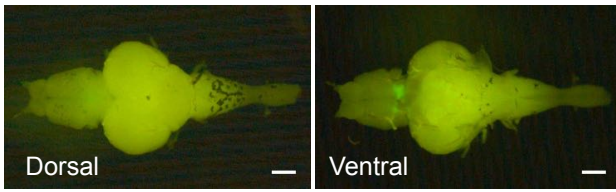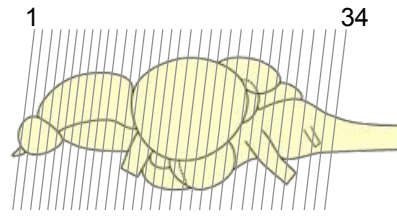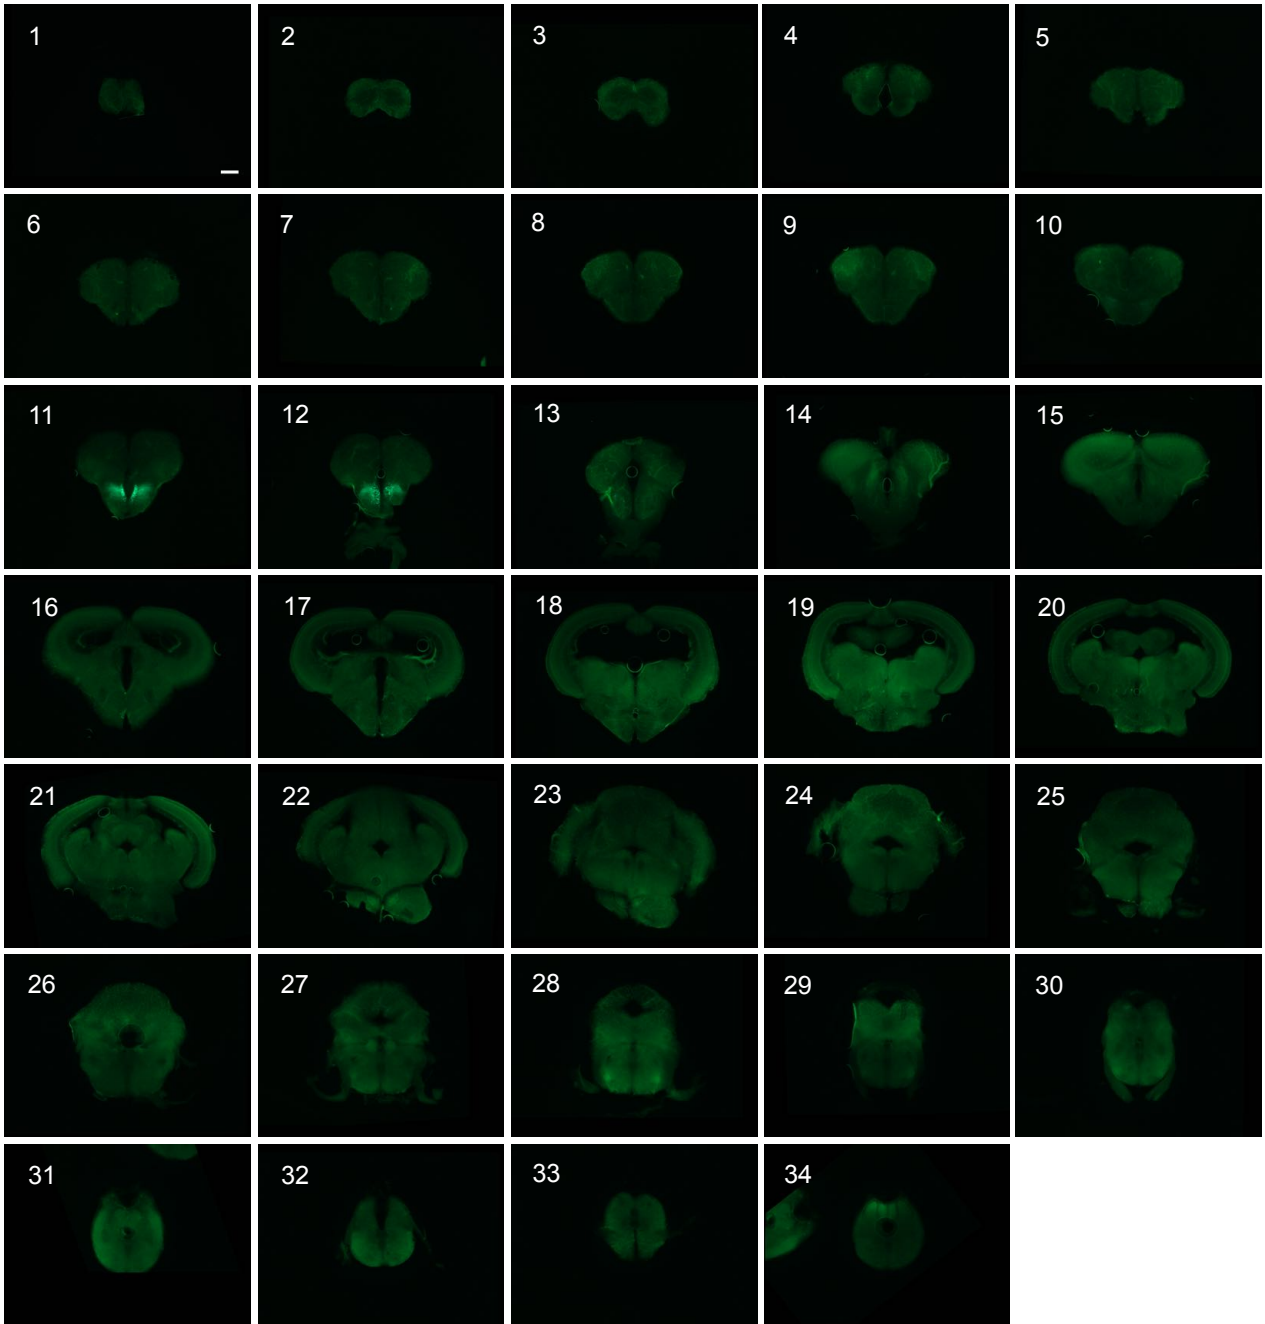

Supplement: 12915_2018_502_MOESM3_ESM.pdf [file 12915_2018_502_MOESM3_ESM.pdf]
